# Supplementary material for: Comparison of Accessibility, Cost, and Quality of Elective Coronary Revascularization Between Veterans Affairs and Community Care Hospitals
Source: PubMed Central journal article supplement (PMC5838592; doi:10.1001/jamacardio.2017.4843), 2018-01-03

## Supplementary Online Content

Barnett PG, Hong JS, Carey E, Grunwald GK, Joynt Maddox K, Maddox TM. Comparison of accessibility, cost, and quality of elective coronary revascularization between Veterans Affairs and Community Care Hospitals. *JAMA Cardiol*. Published online January 3, 2018. doi:10.1001/jamacardio.2017.4843

**eTable.** Principal Diagnoses Used to Identify Readmissions That Were Cardiac Related

**eFigure 1.** PCI Cohort Definition

**eFigure 2.** CABG Cohort Definition

This supplementary material has been provided by the authors to give readers additional information about their work.

**eTable.** Principal Diagnoses Used to Identify Readmissions That Were Cardiac Related

| ICD-9 Code | Full Text Description                                                                                                                                   |
|------------|---------------------------------------------------------------------------------------------------------------------------------------------------------|
| 36845      | Generalized visual field contraction or constriction                                                                                                    |
| 3689       | Unspecified visual disturbance                                                                                                                          |
| 3699       | Unspecified visual loss                                                                                                                                 |
| 37741      | Ischemic optic neuropathy                                                                                                                               |
| 4010       | Malignant essential hypertension                                                                                                                        |
| 4019       | Unspecified essential hypertension                                                                                                                      |
| 40201      | Hypertensive heart disease, malignant, with heart failure                                                                                               |
| 40390      | Hypertensive chronic kidney disease, unspecified, with chronic kidney disease stage i through stage iv, or unspecified                                  |
| 40391      | Hypertensive chronic kidney disease, unspecified, with chronic kidney disease stage v or end stage renal disease                                        |
| 40491      | Hypertensive heart and chronic kidney disease, unspecified, with heart failure and with chronic kidney disease stage i through stage iv, or unspecified |
| 41001      | Acute myocardial infarction, of anterolateral wall, initial episode of care                                                                             |
| 41002      | Acute myocardial infarction, of anterolateral wall, subsequent episode of care                                                                          |
| 41011      | Acute myocardial infarction, of other anterior wall, initial episode of care                                                                            |
| 41012      | Acute myocardial infarction, of other anterior wall, subsequent episode of care                                                                         |
| 41021      | Acute myocardial infarction, of inferolateral wall, initial episode of care                                                                             |
| 41022      | Acute myocardial infarction, of inferolateral wall, subsequent episode of care                                                                          |
| 41031      | Acute myocardial infarction, of inferoposterior wall, initial episode of care                                                                           |
| 41041      | Acute myocardial infarction, of other inferior wall, initial episode of care                                                                            |
| 41042      | Acute myocardial infarction, of other inferior wall, subsequent episode of care                                                                         |
| 41051      | Acute myocardial infarction, of other lateral wall, initial episode of care                                                                             |
| 41061      | Acute myocardial infarction, true posterior wall infarction, initial episode of care                                                                    |
| 41070      | Acute myocardial infarction, subendocardial infarction, episode of care unspecified                                                                     |
| 41071      | Acute myocardial infarction, subendocardial infarction, initial episode of care                                                                         |
| 41072      | Acute myocardial infarction, subendocardial infarction, subsequent episode of care                                                                      |
| 41080      | Acute myocardial infarction, of other specified sites, episode of care unspecified                                                                      |
| 41081      | Acute myocardial infarction, of other specified sites, initial episode of care                                                                          |
| 41090      | Acute myocardial infarction, unspecified site, episode of care unspecified                                                                              |
| 41091      | Acute myocardial infarction, unspecified site, initial episode of care                                                                                  |
| 41092      | Acute myocardial infarction, unspecified site, subsequent episode of care                                                                               |
| 4110       | Postmyocardial infarction syndrome                                                                                                                      |
| 4111       | Intermediate coronary syndrome                                                                                                                          |
| 41181      | Acute coronary occlusion without myocardial infarction                                                                                                  |
| 4131       | Prinzmetal angina                                                                                                                                       |
| 4139       | Other and unspecified angina pectoris                                                                                                                   |

| ICD-9 Code | Full Text Description                                                     |
|------------|---------------------------------------------------------------------------|
| 41400      | Coronary atherosclerosis of unspecified type of vessel, native or graft   |
| 41401      | Coronary atherosclerosis of native coronary vessel                        |
| 41402      | Coronary atherosclerosis of autologous vein bypass graft                  |
| 41403      | Coronary atherosclerosis of nonautologous biological bypass graft         |
| 41404      | Coronary atherosclerosis of artery bypass graft                           |
| 41405      | Coronary atherosclerosis of unspecified type of bypass graft              |
| 41406      | Coronary atherosclerosis, of native coronary artery of transplanted heart |
| 41412      | Dissection of coronary artery                                             |
| 4148       | Other specified forms of chronic ischemic heart disease                   |
| 4149       | Chronic ischemic heart disease, unspecified                               |
| 42090      | Acute pericarditis, unspecified                                           |
| 42099      | Other acute pericarditis                                                  |
| 4210       | Acute and subacute bacterial endocarditis                                 |
| 4230       | Hemopericardium                                                           |
| 4233       | Cardiac tamponade                                                         |
| 4239       | Unspecified disease of pericardium                                        |
| 42490      | Endocarditis, valve unspecified, unspecified cause                        |
| 4260       | Atrioventricular block, complete                                          |
| 42613      | Other second degree atrioventricular block                                |
| 4270       | Paroxysmal supraventricular tachycardia                                   |
| 4271       | Paroxysmal ventricular tachycardia                                        |
| 4272       | Paroxysmal tachycardia, unspecified                                       |
| 42731      | Atrial fibrillation                                                       |
| 42732      | Atrial flutter                                                            |
| 42741      | Ventricular fibrillation                                                  |
| 4275       | Cardiac arrest                                                            |
| 42769      | Other premature beats                                                     |
| 42781      | Sinoatrial node dysfunction                                               |
| 42789      | Other specified cardiac dysrhythmias                                      |
| 4279       | Cardiac dysrhythmia, unspecified                                          |
| 4280       | Congestive heart failure, unspecified                                     |
| 42820      | Unspecified systolic heart failure                                        |
| 42821      | Acute systolic heart failure                                              |
| 42822      | Chronic systolic heart failure                                            |
| 42823      | Acute on chronic systolic heart failure                                   |
| 42830      | Unspecified diastolic heart failure                                       |
| 42831      | Acute diastolic heart failure                                             |
| 42833      | Acute on chronic diastolic heart failure.                                 |
| 42840      | Unspecified combined systolic and diastolic heart failure                 |

| ICD-9 Code | Full Text Description                                                                          |
|------------|------------------------------------------------------------------------------------------------|
| 42841      | Acute combined systolic and diastolic heart failure.                                           |
| 42843      | Acute on chronic combined systolic and diastolic heart failure                                 |
| 4289       | Heart failure, unspecified                                                                     |
| 430        | Subarachnoid hemorrhage                                                                        |
| 431        | Intracerebral hemorrhage                                                                       |
| 4321       | Subdural hemorrhage                                                                            |
| 4329       | Unspecified intracranial hemorrhage                                                            |
| 43310      | Occlusion & stenosis of carotid artery, w/o cerebral infarction                                |
| 43311      | Occlusion & stenosis of carotid artery, w/ cerebral infarction                                 |
| 43330      | Occlusion & stenosis fo multiple & bilateral arteries, w/o mention of cerebral infarction      |
| 43331      | Occlusion& stenosis of multiple & bilateral arteries, w/ cerebral infarction                   |
| 43380      | Occlusion & stenosis of other specified precerebral artery, w/o mention of cerebral infarction |
| 43410      | Cerebral embolism w/o mention of cerebral infarction                                           |
| 43411      | Cerebral embolism w/ cerebral infarction                                                       |
| 43490      | Cerebral artery occlusion, unspecified, w/o mention of cerebral infarction                     |
| 43491      | Cerebral artery occlusion, unspecified, w/ cerebral infarction                                 |
| 4359       | Unspecified transient cerebral ischemia                                                        |
| 436        | Acute, but ill-defined, cerebrovascular disease                                                |
| 4370       | Cerebral atherosclerosis                                                                       |
| 4373       | Cerebral aneurysm, nonruptured                                                                 |
| 43811      | Late effect of cerebrovascular disease, speech and language deficits, aphasia                  |
| 43820      | Late effect of cerebrovascular disease, hemiplegia affecting uspecified side                   |
| 43889      | Other late effects of cerebrovascular disease                                                  |
| 4401       | Atherosclerosis of renal artery                                                                |
| 44020      | Atherosclerosis of native arteries of extremities, unspecified                                 |
| 44021      | Atherosclerosis of native arteries of extremities w/intermittent claudication                  |
| 44022      | Atherosclerosis of native arteries of extremities with rest pain                               |
| 44023      | Atherosclerosis of native arteries of extremities w/ ulceration                                |
| 44024      | Atherosclerosis of native arteries of extremities w/ gangrene                                  |
| 44030      | Atherosclerosis of unspecified bypass graft of the extremities                                 |
| 44031      | Atherosclerosis of autologous vein bypass graft of the extremities                             |
| 4408       | Atherosclerosis of other specified arteries                                                    |
| 44103      | Dissection aorta, thoracoabdominal                                                             |
| 4413       | Abdominal aneurysm, ruptured                                                                   |
| 44322      | Dissection of iliac artery                                                                     |
| 44421      | Arterial embolism and thrombosis of upper extremity                                            |
| 44422      | Arterial embolism and thrombosis of lower extremity                                            |
| 44481      | Embolism and thrombosis of iliac artery                                                        |
| 44489      | Embolism and thrombosis of other artery                                                        |

| ICD-9 Code | Full Text Description                                                                                   |
|------------|---------------------------------------------------------------------------------------------------------|
| 44502      | Atheroembolism lower extremity                                                                          |
| 4580       | Orthostatic hypotension                                                                                 |
| 4581       | Chronic hypotension                                                                                     |
| 45829      | Other iatrogenic hypotension                                                                            |
| 4589       | Hypotension, unspecified                                                                                |
| 45989      | Other specified circulatory system disorders                                                            |
| 4599       | Unspecified circulatory system disorder                                                                 |
| 53100      | Acute gastric ulcer with hemorrhage, without mention of obstruction                                     |
| 53140      | Chronic or unspecified gastric ulcer with hemorrhage, without mention of obstruction                    |
| 53160      | Chronic or unspecified gastric ulcer with hemorrhage and perforation, without mention of obstruction    |
| 53240      | Chronic or unspecified duodenal ulcer with hemorrhage, without mention of obstruction                   |
| 53340      | Chronic or unspecified peptic ulcer of unspecified site with hemorrhage, without mention of obstruction |
| 53541      | Other specified gastritis w hemorrhage                                                                  |
| 53551      | Unspecified gastritis and gastroduodenitis w hemorrhage                                                 |
| 53561      | Duodenitis with hemorrhage                                                                              |
| 53783      | Angiodysplasia of stomach and duodenum w hemorrhage                                                     |
| 53784      | Dielulafoy lesion (hemorrhagic) of stomach and duodenum                                                 |
| 5570       | Acute vascular insufficiency of intestine                                                               |
| 5579       | Unspecified vascular insufficiency of intestine                                                         |
| 5780       | Hematemesis                                                                                             |
| 5781       | Blood in stool                                                                                          |
| 5789       | Hemorrhage of gastrointestinal tract, unspecified                                                       |
| 58089      | Acute glomerulonephritis with other specified pathological lesion in kidney                             |
| 5845       | Acute renal failure with lesion of tubular necrosis                                                     |
| 5849       | Acute renal failure, unspecified                                                                        |
| 5854       | Chronic kidney disease, stage iv (severe)                                                               |
| 5856       | End stage renal disease                                                                                 |
| 586        | Renal failure, unspecified                                                                              |
| 58889      | Other specified disorders resulting from impaired renal function                                        |
| 59970      | Hematuria, unspecified                                                                                  |
| 59971      | Gross hematuria                                                                                         |
| 71916      | Hemarthrosis involving lower leg                                                                        |
| 7802       | Syncope and collapse                                                                                    |
| 78551      | Cardiogenic shock                                                                                       |
| 99603      | Mechanical complication due to coronary bypass graft                                                    |
| 99661      | Infection and inflammatory reaction due to cardiac device, implant, and graft                           |
| 99672      | Other complications due to other cardiac device, implant, and graft                                     |
| 99702      | Iatrogenic cerebrovascular infarction or hemorrhage                                                     |

| ICD-9 Code | Full Text Description                                                          |
|------------|--------------------------------------------------------------------------------|
| 9971       | Cardiac complications, not elsewhere classified                                |
| 9972       | Peripheral vascular complications, not elsewhere classified                    |
| 99779      | Vascular complications of other vessels                                        |
| 99811      | Hemorrhage complicating a procedure                                            |
| 9982       | Accidental puncture or laceration during a procedure, not elsewhere classified |
| 99883      | Non-Healing surgical wound                                                     |
| 99889      | Other specified complications of procedures not elsewhere classified           |
| V5873      | Aftercare following surgery of the circulatory system, nec                     |
| V717       | Observation for suspected cardiovascular disease                               |

**eFigure 1. PCI Cohort Definition.** Of 59,925 procedures sponsored by VA between 2008 and 2011, 13,237 were included in the final cohort.

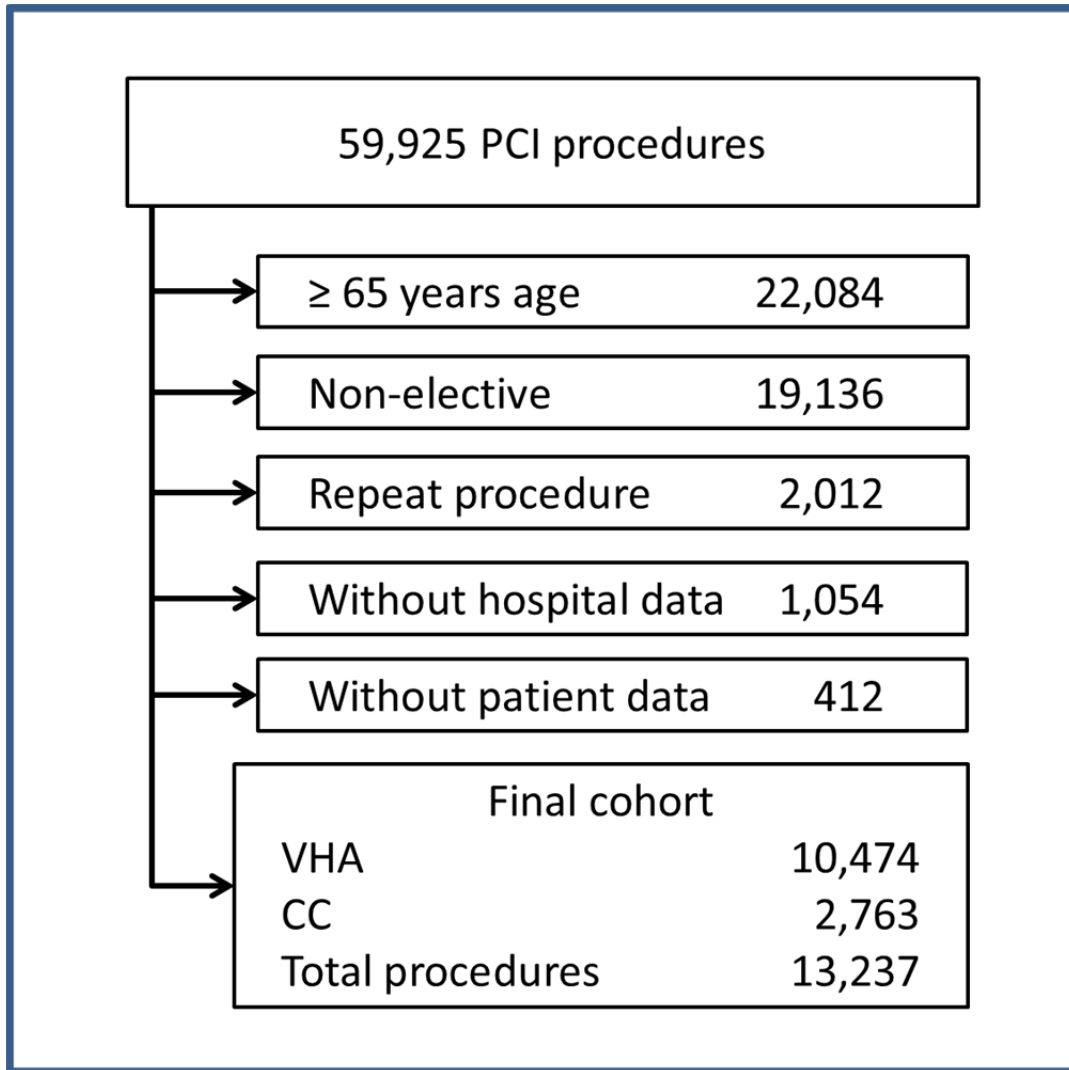

**eFigure 2.** CABG Cohort Definition. Of 18,816 CABG surgeries sponsored by VA between 2008 and 2011, 5,818 were included in the final cohort.

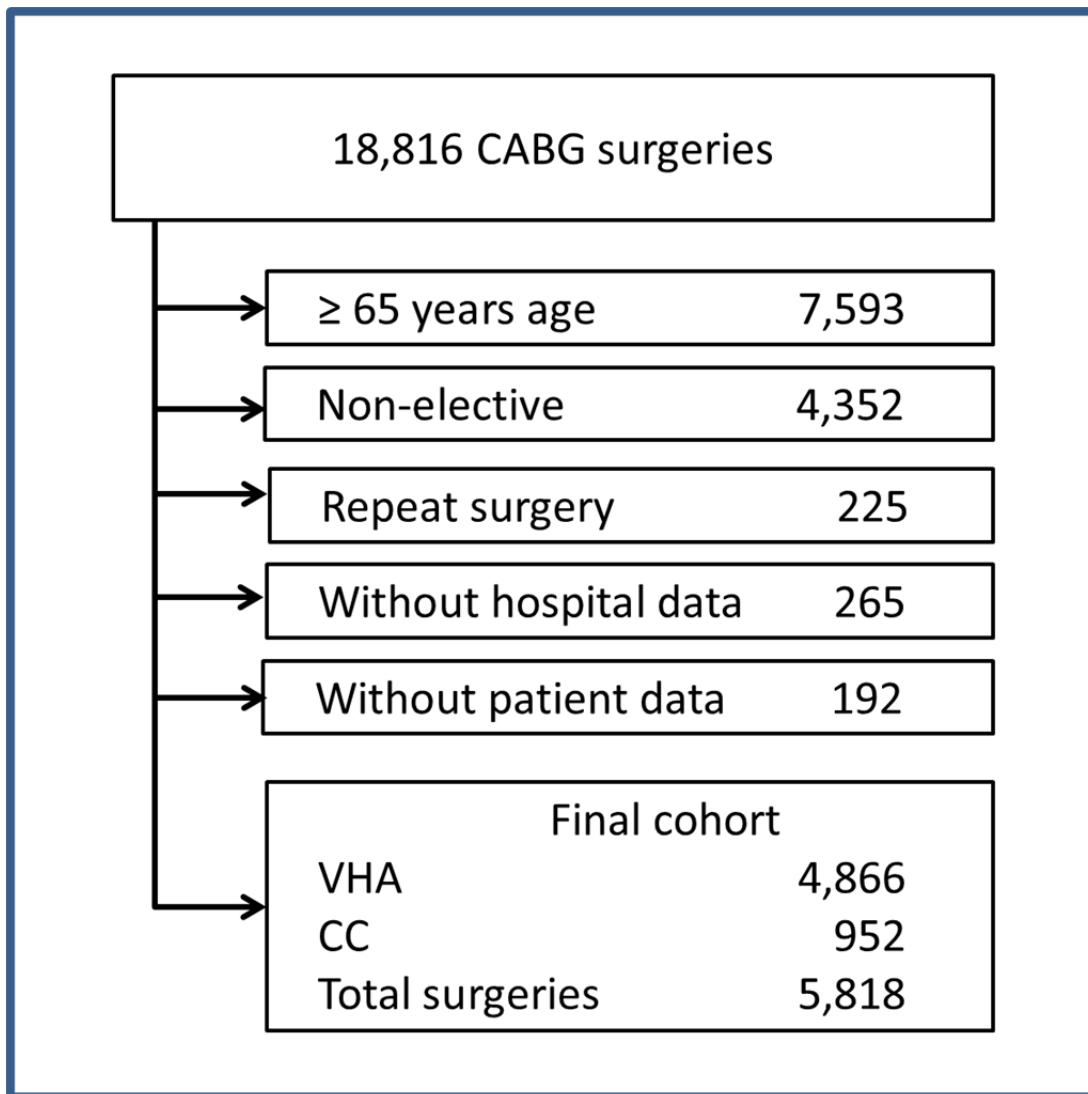

Supplement: jamacardiol-3-133-s001.pdf [file jamacardiol-3-133-s001.pdf]
